# Supplementary material
Source: publisher figshare collection journal article supplement (https://aacr.figshare.com/articles/dataset/_/22474496)
Supplement: Supplementary file 1 [file 39925991]

**A**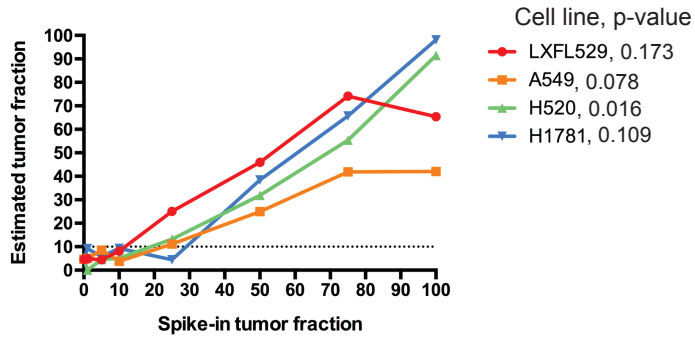**B**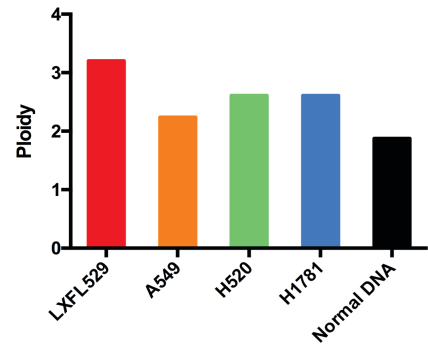**C**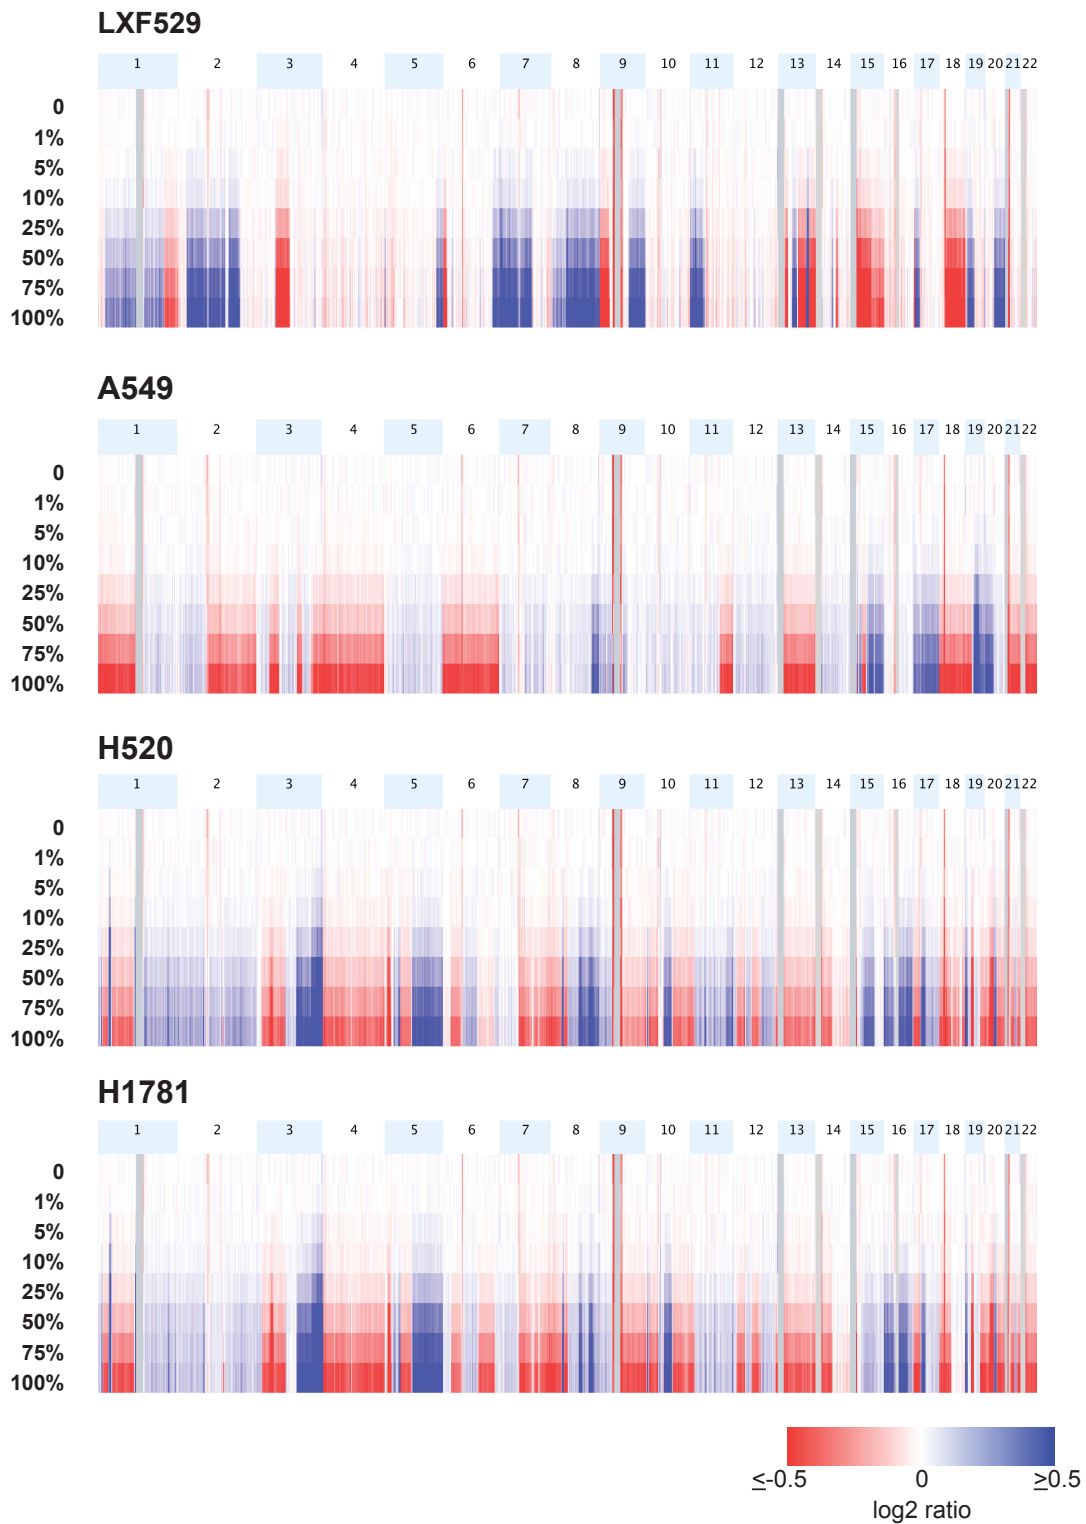

D

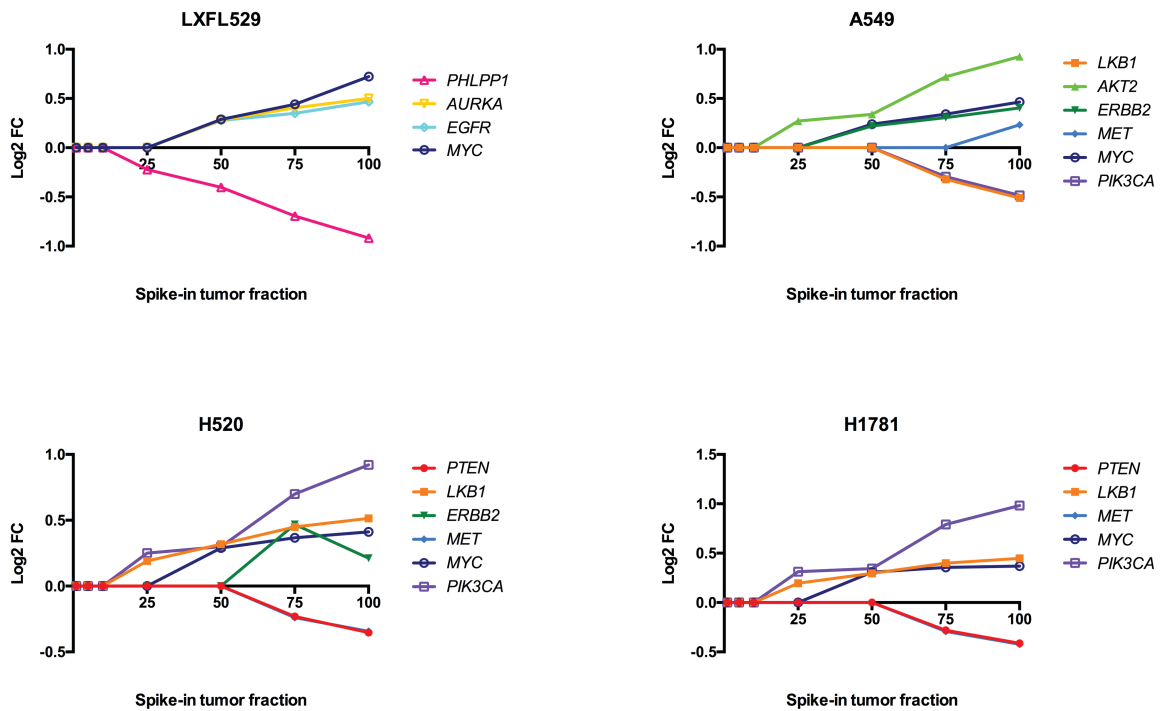

E

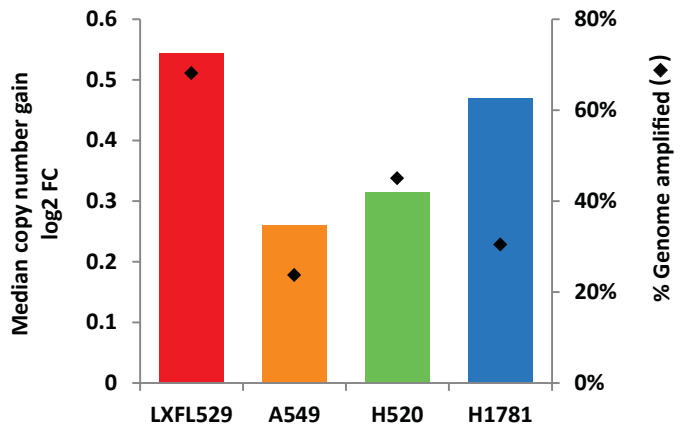

**Figure S1.**

Tumor cell line DNA spike-in. Tumor DNA from 4 lung cancer cell lines was mixed with normal DNA at 0, 1%, 5%, 10%, 25%, 50%, 75% or 100%. **A**, Comparison of estimated tumor fraction by LP-WGS to real spike-in tumor fraction. Wilcoxon signed ranked test p-values are listed. **B**, Ploidy of the four cell lines and normal DNA estimated by LP-WGS. **C**, CNVs across the whole genome detected at different spike-in ratios. Heatmap density represents CNV log<sub>2</sub> ratios between cfDNA sample and normal reference, ranging between  $\leq -0.5$  to  $\geq 0.5$ . Blue, copy number gain; red, copy number loss. **D**, CNV fold change of lung cancer-related genes, normalized to the healthy reference, detected at different spike-in ratios. **E**, Cell line median copy number gain (bars) and % genome amplified (diamonds) in the 100% spike in (pure cell line).
